# Supplementary material for: Metagenomics of gut microbiome for migratory seagulls in Kunming city revealed the potential public risk to human health
Source: Springer Nature journal article supplement (doi:10.1186/s12864-023-09379-1), 2023-05-19
Supplement: 12864_2023_9379_MOESM6_ESM.pdf [file 12864_2023_9379_MOESM6_ESM.pdf]

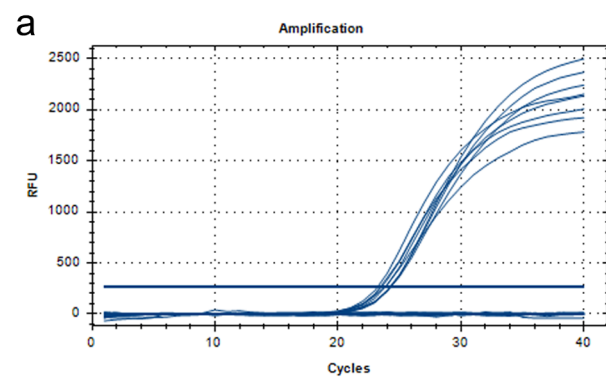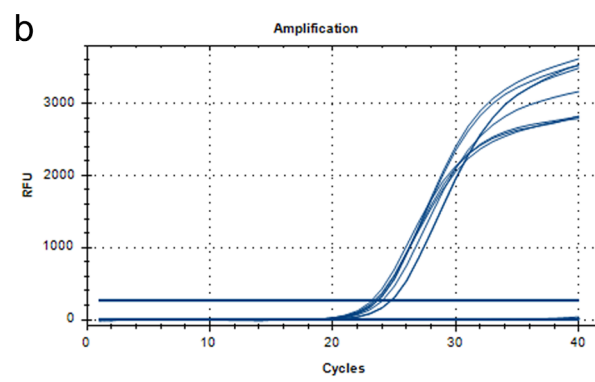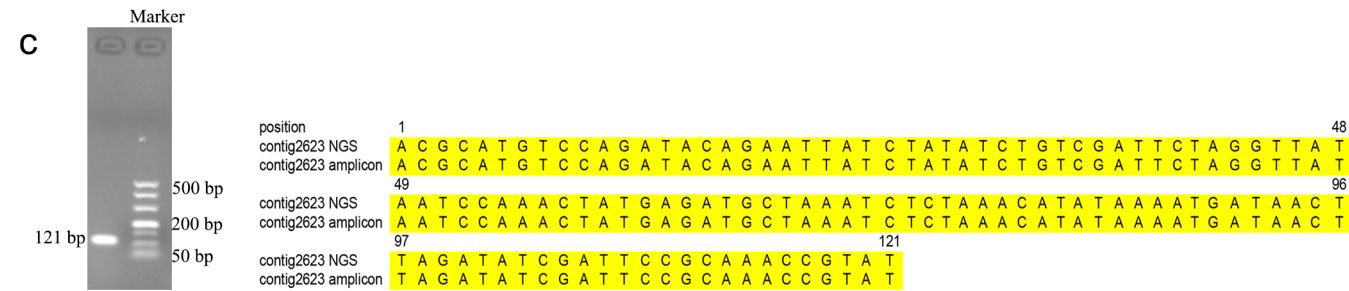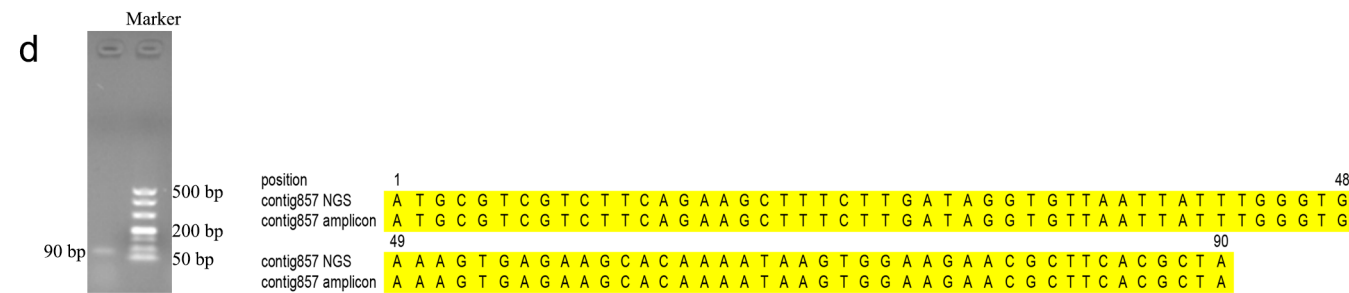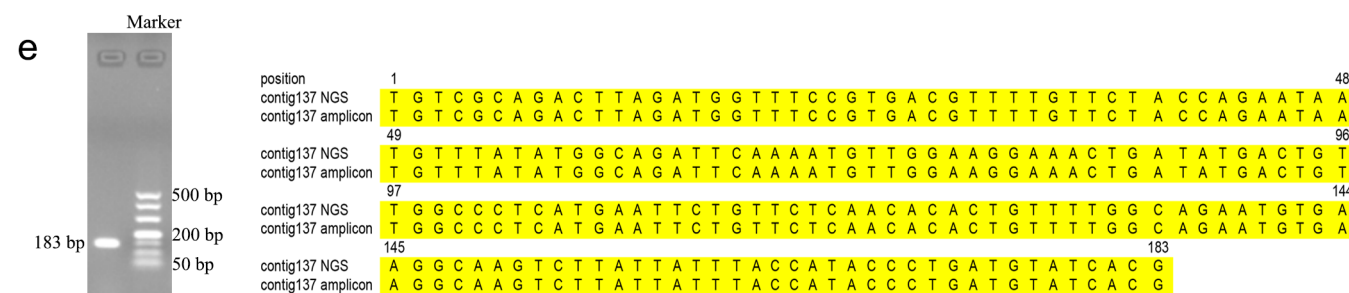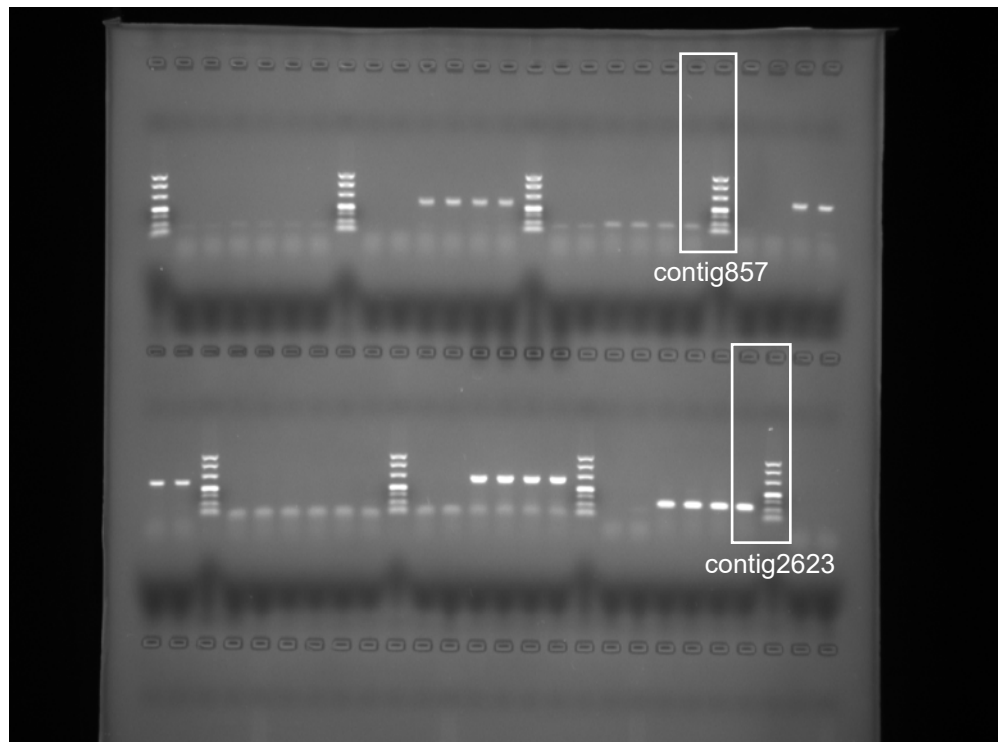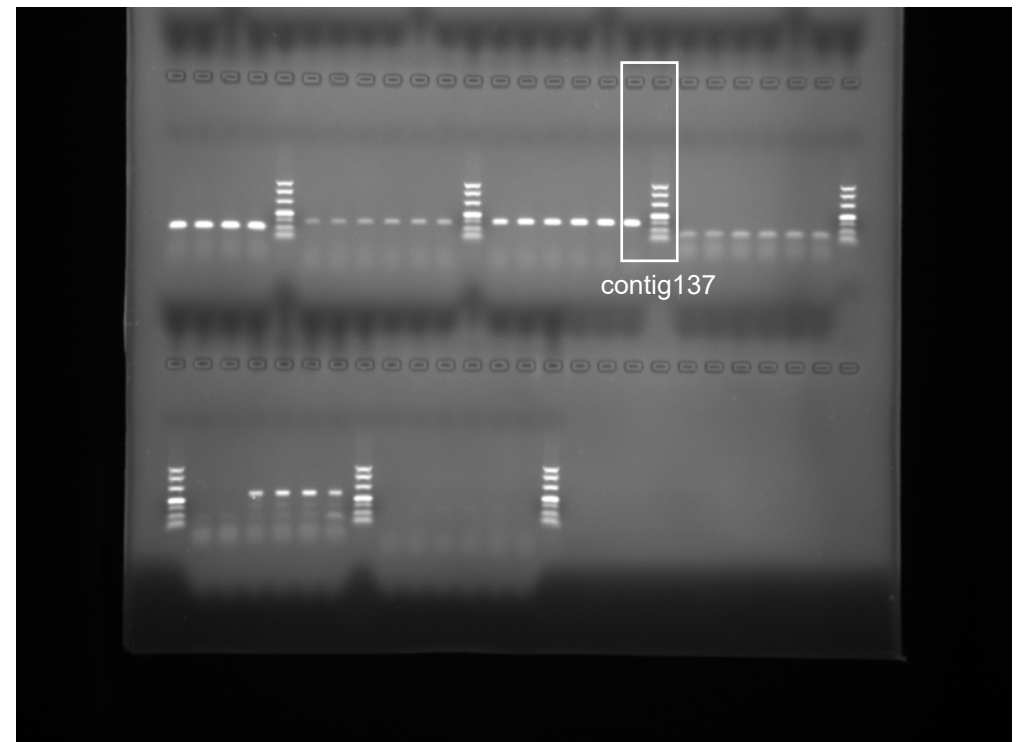

Additional file 6. Verification of NGS data in this study.

- a. Real-time PCR results for Salmonella spp. detection. The amplification curves were 8 seagull feces samples, and all the environmental samples were negative
- b. Real-time PCR results for Shigella spp. detection. The amplification curves were 8 seagull feces samples, and all the environmental samples were negative
- c. The agarose gel electrophoresis and sequence alignment of contig 2623 (The original gel electrophoresis was shown below)
- d. The agarose gel electrophoresis and sequence alignment of contig 857 (The original gel electrophoresis was shown below)
- e. The agarose gel electrophoresis and sequence alignment of contig 137 (The original gel electrophoresis was shown below)
