# Supplementary material for: Metagenomics of gut microbiome for migratory seagulls in Kunming city revealed the potential public risk to human health
Source: Springer Nature journal article supplement (doi:10.1186/s12864-023-09379-1), 2023-05-19
Supplement: 12864_2023_9379_MOESM7_ESM.pdf [file 12864_2023_9379_MOESM7_ESM.pdf]

Additional file 7. The primers used for PCR amplification of some novel viruses in RNA virome

| Contigs     | Forward (5')        | Reverse (3')         | Lengths | Annealing temp |
|-------------|---------------------|----------------------|---------|----------------|
| contig_2623 | ACGCATGTCCAGATACAG  | ATACGGTTTGCGGAATCG   | 121 bp  | 55°C           |
| contig_857  | ATGCGTCGTCTTCAGAAGC | TAGCGTGAAGCGTTCTTCC  | 90 bp   | 55°C           |
| contig_137  | TGTCGCAGACTTAGATGG  | CGTGATACATCAGGGTATGG | 183 bp  | 55°C           |
